# Supplementary material for: Use of Attribute Driven Incremental Discretization and Logic Learning Machine to build a prognostic classifier for neuroblastoma patients
Source: PubMed Central journal article supplement (PMC4095004; doi:10.1186/1471-2105-15-s5-s4), 2014-05-06
Supplement: 1471-2105-15-S5-S4-S1.pdf [file 1471-2105-15-S5-S4-S1.pdf]

Additional file 1

**Table 1 - Influence of batch effect on LLM prediction performance**

| <b>Dataset modification<sup>f</sup></b> | <b>Accuracy<sup>a</sup></b> | <b>Recall<sup>b</sup></b> | <b>Precision<sup>c</sup></b> | <b>Specificity<sup>d</sup></b> | <b>NPV<sup>e</sup></b> |
|-----------------------------------------|-----------------------------|---------------------------|------------------------------|--------------------------------|------------------------|
| <b>None</b>                             | 80%                         | 90%                       | 82%                          | 57%                            | 72%                    |
| <b>FSVA Batch adjusted<sup>f</sup></b>  | 74%                         | 78%                       | 83%                          | 65%                            | 58%                    |

<sup>a</sup> Accuracy is the fraction of correctly classified patients and overall classified patients.

<sup>b</sup> Recall is the fraction of correctly classified good outcome patients and the overall predicted good outcome patients

<sup>c</sup> Precision is the fraction of correctly classified good outcome patients and the predicted good outcome patients.

<sup>d</sup> Specificity is the fraction of correctly classified poor outcome patients and the overall poor outcome patients

<sup>e</sup> NPV (Negative predictive value) is the fraction of correctly classified poor outcome patients and the overall predicted poor outcome patients

<sup>f</sup> The dataset was modified according to the FSVA batch effect removal method described in the Materials and Methods.
